# Supplementary material for: H3K36 dimethylation shapes the epigenetic interaction landscape by directing repressive chromatin modifications in embryonic stem cells
Source: PubMed Central journal article supplement — Genome Res. 2022 May;32(5):825–37. doi: 10.1101/gr.276383.121 (PMC9104706; doi:10.1101/gr.276383.121), 2022-05
Supplement: supp_gr.276383.121_Supplementary_Fig_S2.pdf [file supp_gr.276383.121_Supplementary_Fig_S2.pdf]

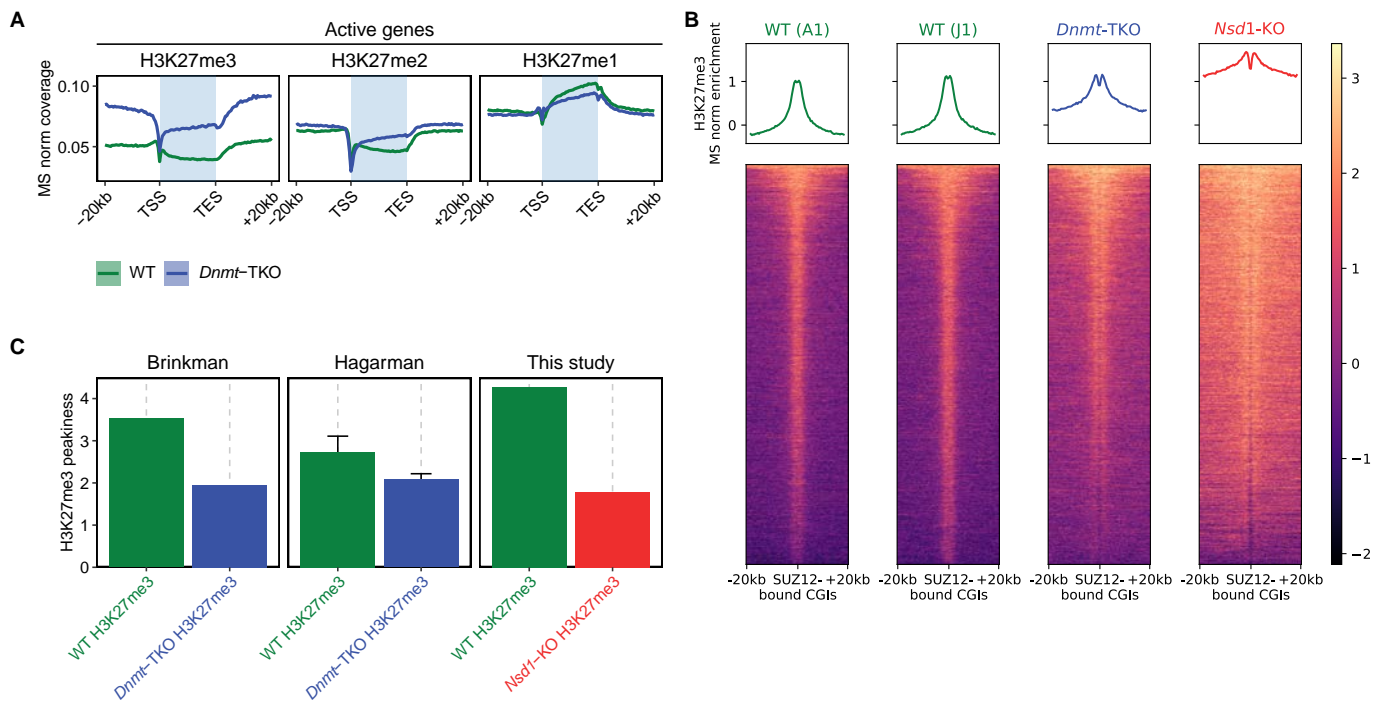

**Figure S2. Comparison of H3K27me3 in WT, *Dnmt*-TKO and *Nsd1*-KO, using replicates.** A) Aggregate plots of H3K27me1/2/3 (normalized by read depth and MS ratios) around active genes ( $n = 15850$ ) in WT vs *Dnmt*-TKO, showing the limited changes of these marks especially H3K27me1/2 between the two conditions. B) Signal intensity plot (normalized by input and MS ratios) of H3K27me3 (Replicate 2) centred on CGIs overlapping SUZ12 peaks ( $n = 4543$ ), confirming limited and localized H3K27me3 spread in *Dnmt*-TKO and full spread in *Nsd1*-KO. The “dip” in the centre appears in all four samples, is due to technical artifact, most likely a GC bias in the library preparation for this batch of samples (Replicate 2). C) Peakiness score of H3K27me3, using replicates in-house and from public sources. The in-house replicates confirm the spreading (i.e. lower peakiness) of H3K27me3 in *Nsd1*-KO. The replicates from public sources confirm a certain spread of H3K27me3 in *Dnmt*-TKO. ChIP-seq data used in (A) and (B) as well parts of (C) are generated in this study; (C) also includes data from Brinkman et al. 2012) and Hagarman et al. 2013.
