# Supplementary material for: H3K36 dimethylation shapes the epigenetic interaction landscape by directing repressive chromatin modifications in embryonic stem cells
Source: HighWire-hosted journal article supplement (doi:10.1101/gr.276383.121), 2022-04-08
Supplement: Supplementary_Methods.docx [file Supplementary_Methods.docx]

**SUPPLEMENTARY METHODS**

**Culture of mouse ES cells**

Biological replicates were obtained by culturing and processing the different lines at two institutions: the Rockefeller University (Rep 1) and McGill University (Rep 2). The cell lines were maintained under standard serum/LIF conditions, with differences outlined in detail below. For Rep 1, the cells were maintained on gelatin-coated plates in Knockout DMEM (Gibco) supplemented with 15% ES-cell-qualified FBS (Gemini), 0.1 mM 2-mercapoethanol, 2mM L-glutamine (Life technologies) and LIF. RNA and DNA were collected from cell grown using this method. For Rep2 , cells were cultured in Knockout-DMEM (Gibco) with 15% ES qualified FBS (Gibco), ESGRO mouse LIF 1000U/mL (Millipore), 1X PenStrep (Invitrogen), 1X Glutamax (Invitrogen), 55µM b-merceptoethanol (Invitrogen), 1X non-essential amino acids (Invitrogen) and 1X Primocin (Invivogen). Cells were maintained at 37 °C and 5% CO2 on a layer of murine embryonic feeders (MEFs) as described in Tsumura et al. (Tsumura et al. 2006).

## **Histone acid extraction, histone derivatization, and analysis of post-translational modifications by nano-LC–MS**

### Cell frozen pellets were lysed in nuclear isolation buffer (15 mM Tris pH 7.5, 60 mM KCl, 15 mM NaCl, 5 mM MgCl2, 1 mM CaCl2, 250 mM sucrose, 10 mM sodium butyrate, 0.1% v/v b-mercaptoethanol, commercial phosphatase and protease inhibitor cocktail tablets) containing 0.3% NP-40 alternative on ice for 5 min. Nuclei were washed in the same solution without NP-40 twice and the pellet was slowly resuspended while vortexing in chilled 0.4 N H2SO4, followed by 3 h rotation at 4 °C. After centrifugation, supernatants were collected and proteins were precipitated in 20% TCA overnight at 4 °C, washed with 0.1% HCl (v/v) acetone once and twice using acetone only, to be resuspended in deionized water. Acid-extracted histones (5–10 μg) were resuspended in 100 mM ammonium bicarbonate (pH 8), derivatized using propionic anhydride and digested with trypsin as previously described(Sidoli et al. 2016). After the second round of propionylation, the resulting histone peptides were desalted using C18 Stage Tips, dried using a centrifugal evaporator and reconstituted using 0.1% formic acid in preparation for liquid chromatography-mass spectrometry (LC–MS) analysis. Nanoflow liquid chromatography was performed using a Thermo Fisher Scientific. Easy nLC 1000 equipped with a 75 µm × 20-cm column packed in-house using Reprosil-Pur C18-AQ (3 µm; Dr. Maisch). Buffer A was 0.1% formic acid and Buffer B was 0.1% formic acid in 80% acetonitrile. Peptides were resolved using a two-step linear gradient from 5% B to 33% B over 45 min, then from 33% B to 90% B over 10 min at a flow rate of 300 nl min−1. The HPLC was coupled online to an Orbitrap Elite mass spectrometer operating in the positive mode using a Nanospray Flex Ion Source (Thermo Fisher Scientific) at 2.3 kV. Two full mass spectrometry scans (*m*/*z* 300–1,100) were acquired in the Orbitrap Fusion mass analyzer with a resolution of 120,000 (at 200 *m*/*z*) every 8 data-independent acquisition tandem mass spectrometry (MS/MS) events, using isolation windows of 50 *m*/*z* each (for example, 300–350, 350–400…650–700). MS/MS spectra were acquired in the ion trap operating in normal mode. Fragmentation was performed using collision-induced dissociation in the ion trap mass analyzer with a normalized collision energy of 35. The automatic gain control target and maximum injection time were 5 × 105 and 50 ms for the full mass spectrometry scan, and 3 × 104 and 50 ms for the MS/MS scan, respectively. Raw files were analysed using EpiProfile 2.0(Yuan et al. 2018). The area for each modification state of a peptide was normalized against the total signal for that peptide to give the relative abundance of the histone modification.

**ChIP-sequencing**

For the first set of sample collection for chromatin immunoprecipitation and sequencing (ChIP-seq) (Rep 1), the method was described in Weinberg et al (2020). Briefly, cells were cross-linked using 1% paraformaldehyde, washed and pelleted. Soluble chromatin extracts were obtained by first resuspending the pellets and incubating 10 minutes using 1 mL LB1 (50 mM HEPES, 140 mM NaCl, 1 mM EDTA, 10% glycerol, 0.5% NP-40, 0.25% Triton X-100, 1x Complete protease inhibitor). Pelleted cells were then resuspended in 1 mL LB2 (10 mM Tris-HCl pH 8.0, 200 mM NaCl, 1 mM EDTA, 0.5 mM EGTA, 1x Compete protease inhibitor) and incubated another 10 minutes. Finally, samples were centrifuged, and pellets resuspended in 1 mL LB3 (10 mM Tris-HCl pH 8.0, 100 mM NaCl, 1 mM EDTA, 0.5 mM EGTA, 0.1% Na deoxycholate, 0.5% N-lauroylsarcosine, 1% Triton X-100, 1x Complete protease inhibitor). The solution was homogenized by passing two times through a 27-gauge needle. Chromatin extracts were sonicated for 12 min using a Covaris E220 focused ultra-sonicator at peak power 140, duty factor 5, and cycles/burst 200. Soluble chromatin was spiked-in with soluble chromatin from Drosophila S2 cells that was similarly prepared and equivalent to 5-10% of the mouse/human cell chromatin. The lysates were incubated with anti-H3K27ac (Active Motif, 39133), anti-H3K27me3 (Cell Signaling Tech, 9733), anti-H3K27me2 (Cell Signaling Tech, 9728), anti-H3K27me1 (Active Motif, 61015), anti-H3K36me2 (Cell Signaling, 2901) antibodies bound to 75 μl protein A or protein G Dynabeads (Invitrogen) and incubated overnight at 4°C with 5% kept as input DNA. Magnetic beads were sequentially washed with low salt buffer (150 mM NaCl; 0.1% SDS; 1% Triton X-100; 1 mM EDTA; 50 mM Tris-HCl), high salt buffer (500 mM NaCl; 0.1% SDS; 1% Triton X-100; 1 mM EDTA; 50 mM Tris-HCl), LiCl buffer (150 mM LiCl; 0.5% Na deoxycholate; 0.1% SDS; 1% Nonidet P-40; 1 mM EDTA; 50 mM Tris-HCl) and TE buffer (1 mM EDTA; 10 mM Tris-HCl). Beads were resuspended in elution buffer (1% SDS, 50 mM Tris-HCl pH 8.0, 10mM EDTA, 200 mM NaCl) and incubated for 30 min at 65°C. After centrifugation the eluate was reverse cross-linked overnight at 65°C. The eluate was then treated with RNaseA for 1 hr at 37°C and with Proteinase K (Roche) for 1 hr at 55°C and DNA was recovered using Qiagen PCR purification kit. Libraries were generated using KAPA Hyper Prep Kit according to manufacturer’s instructions. ChIP libraries were sequenced using Illumina HiSeq 4000 at 50bp single-end reads or Illumina NovaSeq 6000 at 50bp or 100bp single-end reads.

For the second set of sample collection for chromatin immunoprecipitation and sequencing (ChIP-seq) (Rep 2), cells were maintained on a layer of murine embryonic feeders (MEFs) were passaged once on plates pretreated with 0.1% gelatin but without feeders. The day of collection, cells were washed with PBS followed by digestion with TrypLE 30% (for A1 lines) or trypsin 0.25% (for J1 lines) for 7 minutes at 37 °C. Trypsinizaton was terminated by addition of 1X SoyBean Trypsin inhibitor (for A1 lines) or of media (for J1 lines). 5 million cells per condition were collected by 300xg centrifugation and resuspended in 900µl 1X PBS at room temperature. Cells were fixed by the addition of 60µl of 16% fresh formaldehyde (1% final conc., Pierce) followed by an incubation of 10 minutes at room temperature, with rotation. The reaction was stopped by adding glycine 1M to a final concentration of 0.14M, followed by another incubation of 10 minutes at room temperature, with rotation. Cells were collected by centrifugation at 3000 rpm for 5 minutes at 4°C and washed once with 1X PBS. Aliquots of 1 million cells were flash frozen and stored at -80°C.

To lyse the cells for ChIP, cells were thawed and resuspended with 1mL of lysis buffer 1 (10mM Tris-HCl pH 8.0, 0.25% Triton X-100, 10mM EDTA, 0.5mM EGTA, 1x Protease inhibitors, and 1mM PMSF), then incubated with rotation for 15 minutes at room temperature. Nuclei were pelleted by centrifugation at 1465 ×g for 5 minutes at 4°C. Nuclei were then resuspended with 1mL of lysis buffer 2 (10mM Tris-HCl pH 8.0, 200mM NaCl, 10mM EDTA, 0.5mM EGTA, 1x Protease inhibitors, and 1mM PMSF), then incubated with rotation for 10 minutes at 4°C. Nuclei were pelleted by centrifugation at 1465 ×g for 5 minutes at 4°C. Nuclei were then resuspended in 900uL of lysis buffer 3 (10mM Tris-HCl pH 8.0, 10mM EDTA, 0.5mM EGTA, 0.1% SDS, 1x Protease inhibitors, and 1mM PMSF) and sonicated in a Covaris M220 instrument (PIP = 75; CPB = 200; Duty Factor = 20%; Time = 10 minutes; Setpoint temperature = 7°C) using a 1mL AFA Fiber milliTube (Covaris). The sonicated lysate was centrifuged at max. speed for 10 minutes at 4°C, and the supernatant was retained.

30uL of Protein A Dynabeads (Invitrogen 10001D) were washed three times with ChIP dilution buffer (16.7mM Tris-HCl pH 8.0, 0.01% SDS, 1.1% Triton X-100, 1.2mM EDTA, and 167mM NaCl), each wash consisting of addition of 1mL of buffer and collection of the beads on a magnetic rack. The 30uL beads were then resuspended in 900uL of dilution buffer and combined with the ChIP sample to pre-clear the sample. Beads and chromatin were incubated with rotation for 2 hours at 4°C. Beads were then collected on a magnetic rack and the supernatant was retained.

2uL of SNAP-ChIP K-MetStat panel (EpiCypher, 19-1001) was added to the sample chromatin. SNAP-ChIP K-MetStats are barcoded recombinant nucleosomes bearing distinct methyl-lysine modifications and was used as spike-in controls for ChIP reactions. 1% of the sample was saved as Input, the rest was used for ChIP. 2uL of antibody (Cell Signaling; anti-H3K27me3 (9733S), (Cell Signaling; anti-H3K36me2 (2901S)) was added to the ChIP sample. The samples were then rotated overnight at 4°C.

60uL of Protein A Dynabeads were washed three times with 1mL of ChIP dilution buffer and resuspended in 60uLof dilution buffer. Beads were then added to the ChIP sample and rotated for 2 hours at 4°C. The beads were then washed twice with Wash buffer A (50mM HEPES pH 7.9, 1% Triton X-100, 0.1% Deoxycholate, 1mM EDTA, and 140mM NaCl), with Wash buffer B (50mM HEPES pH 7.9, 0.1% SDS, 1% Triton X-100, 0.1% Deoxycholate, 1mM EDTA, and 500mM NaCl), and with TE buffer (10mM Tris-HCl pH 8.0, 1mM EDTA). Each wash consists of resuspension in 500μL buffer and rotation for 4 minutes, followed by collection of beads and removal of supernatant.

DNA was eluted in 100μL elution buffer (50mM TrisHCl pH 8.0, 1mM EDTA, and 1% SDS) at 65°C for 10 minutes shaking at 1400RPM on orbital shaker. The eluent was collected and the beads were subjected to a second round of elution with 150μL elution buffer. The ChIP eluants were pooled, and the input sample was diluted to 250μL with elution buffer. These samples were incubated at 65°C overnight to promote decrosslinking. The samples were then allowed to cool to room temperature, 15μg of RNAse A (PureLink, Invitrogen) was added, and the samples were incubated at 37°C for 30 minutes to degrade RNA. 100μg Proteinase K was then added and the samples were incubated at 56°C for two hours. DNA was purified using a MinElute PCR Purification kit (Qiagen).

DNA was sonicated again to 150bp average fragment size with a Covaris M220 instrument (PIP = 75; CPB = 200; Duty Factor = 20%; Time = 10 minutes; Setpoint temperature = 20°C) and libraries were generated using the Accel-NGS 2S Plus DNA Library Kit (Swift) according to manufacturer’s protocol, and sequenced using Illumina HiSeq 4000 at paired-end 150.

To complete our study, additional samples (mESC WT J1 and mESC *Dnmt*-TKO) were prepared following method B of cell growth and fixation. Chromatin immunoprecipitation was performed as in Farhangdoost et al. 2021. Briefly, sonication was performed on a BioRuptor UCD-300 for 60 cycles at 4 °C (10 s on followed by 20 s off, centrifuging every 15 cycles), and ChIP-Rx for H3K27me1 (Active Motif, 61015) and H3K27me2 (Cell Signaling Tech, 9728) using 2% S2 chromatin spike-in was performed on a Diagenode SX-8G IP-Star Compact using the Diagenode Automated Ideal ChIP–seq kit according to the manufacturer’s instructions. Libraries were generated using KAPA Hyper Prep Kit according to manufacturer’s instructions. ChIP libraries were sequenced using Illumina NovaSeq 6000 at 50bp or 100bp single-end reads.

References

Sidoli S, Bhanu NV, Karch KR, Wang X, Garcia BA. 2016. Complete Workflow for Analysis of Histone Post-translational Modifications Using Bottom-up Mass Spectrometry: From Histone Extraction to Data Analysis. *J Vis Exp* doi:10.3791/54112.

Tsumura A, Hayakawa T, Kumaki Y, Takebayashi S, Sakaue M, Matsuoka C, Shimotohno K, Ishikawa F, Li E, Ueda HR et al. 2006. Maintenance of self-renewal ability of mouse embryonic stem cells in the absence of DNA methyltransferases Dnmt1, Dnmt3a and Dnmt3b. *Genes Cells* **11**: 805-814.

Yuan ZF, Sidoli S, Marchione DM, Simithy J, Janssen KA, Szurgot MR, Garcia BA. 2018. EpiProfile 2.0: A Computational Platform for Processing Epi-Proteomics Mass Spectrometry Data. *J Proteome Res* **17**: 2533-2541.
