# Supplementary material for: H3K36 dimethylation shapes the epigenetic interaction landscape by directing repressive chromatin modifications in embryonic stem cells
Source: HighWire-hosted journal article supplement (doi:10.1101/gr.276383.121), 2022-04-08
Supplement: Supplementary_Table_S1.xlsx [file Supplementary_Table_S1.xlsx]

## Sheet: Sheet1
Table S1. Quantitative histone mass spectrometry measured modification prevalence
Sample	H3K27			H3K36
	me1	me2	me3	me1	me2	me3
mESC A1 WT 1	43.6	34.7	6.4	32.2	30.1	3
mESC A1 WT 2	41.8	36.4	6.5	32.7	30.2	2.1
mESC A1 Nsd1-KO 1	28.8	36.3	21	7.3	6	2.8
mESC A1 Nsd1-KO 2	27.2	38.5	22.1	6.3	6.7	2.7
mESC A1 Ezh2-KO 1	42.6	5.8	0	29.8	30	2.3
mESC A1 Ezh2-KO 2	46	5.9	0	32.9	25.5	2.4
mESC J1 WT 1	39.4	35.6	6.9	31.7	30.4	3.2
mESC J1 WT 2	47.9	27.1	5.9	35.1	24.6	3.8
mESC J1 Dnmt-TKO 1	42.4	29.8	10.1	31.7	19.3	2.5
mESC J1 Dnmt-TKO 2	39	33.1	12.1	33	20.4	2.3
