# Supplementary material for: H3K36 dimethylation shapes the epigenetic interaction landscape by directing repressive chromatin modifications in embryonic stem cells
Source: HighWire-hosted journal article supplement (doi:10.1101/gr.276383.121), 2022-04-08
Supplement: Supplementary_Table_S3.xlsx [file Supplementary_Table_S3.xlsx]

## Sheet: Sheet1
Table S3. Drosophila-Rx and SNAP-Chip spike in normalization for ChIP-seq.
Mark	Condition	Replicate	Line	NormFac1	log2OverWT2	Method
H3K27me1	Dnmt-TKO	1	J1	1.52859	-0.534441	ChIP-Rx
H3K27me2	Dnmt-TKO	1	J1	1.46228	0.000442187	ChIP-Rx
H3K27me3	Dnmt-TKO	1	J1	0.189361	-0.371142	ChIP-Rx
H3K36me2	Dnmt-TKO	1	J1	2.28868	-0.248226	ChIP-Rx
H3K27ac	Nsd1-KO	1	A1	0.897306	-0.302487	ChIP-Rx
H3K27me1	Nsd1-KO	1	A1	1.6891	-0.390387	ChIP-Rx
H3K27me2	Nsd1-KO	1	A1	0.835162	-0.807647	ChIP-Rx
H3K27me3	Nsd1-KO	1	A1	0.937417	1.93641	ChIP-Rx
H3K36me2	Nsd1-KO	1	A1	0.837674	-1.69828	ChIP-Rx
H3K36me3	Nsd1-KO	1	A1	0.247978	-0.129377	ChIP-Rx
H3K27ac	WT	1	A1	1.10662	0	ChIP-Rx
H3K27me1	WT	1	A1	2.21398	0	ChIP-Rx
H3K27me2	WT	1	A1	1.46183	0	ChIP-Rx
H3K27me3	WT	1	A1	0.244915	0	ChIP-Rx
H3K36me2	WT	1	A1	2.71837	0	ChIP-Rx
H3K36me3	WT	1	A1	0.271244	0	ChIP-Rx
H3K27me1	WT	2	J1	1.70045	0	ChIP-Rx
H3K27me2	WT	2	J1	1.71172	0	ChIP-Rx
H3K27me3	Dnmt-TKO	2	J1	1.85367	-0.212765	SNAP-ChIP 3
H3K36me2	Dnmt-TKO	2	J1	2.8914	0.787663	SNAP-ChIP
H3K27me3	Ezh2-KO	2	A1	0.310683	-2.83981	SNAP-ChIP
H3K36me2	Ezh2-KO	2	A1	11.382	-0.930241	SNAP-ChIP
H3K27me3	Nsd1-KO	2	A1	6.2987	1.50173	SNAP-ChIP
H3K36me2	Nsd1-KO	2	A1	12.2958	-0.818834	SNAP-ChIP
H3K27me3	WT	2	A1	2.22426	0	SNAP-ChIP
H3K36me2	WT	2	A1	21.6895	0	SNAP-ChIP
H3K27me3	WT	2	J1	2.14823	0	SNAP-ChIP
H3K36me2	WT	2	J1	1.67493	0	SNAP-ChIP
1 The ratio of target to spike-in chromatin DNA (either Drosophila Rx or synthetic SNAP) in ChIP compared to Input, as described in Methods.
2 Level of histone modification, relative to WT.
3 We found that a significant portion of the synthetic nucleosomes were lost during the ChIP procedure across all modifications, and we consider that the SNAP-ChIP values to be less reliable than the Drosophila spike-in. SNAP-ChIP normalization was only used in Figure S2B.
